# Supplementary material for: Development of new levodopa treatment strategies in Parkinson’s disease—from bedside to bench to bedside
Source: PubMed Central journal article supplement (PMC5441375; doi:10.1080/03009734.2017.1285374), 2017-03-03

## Dositag

Tagna doser, dygnsmedelvärde 2014

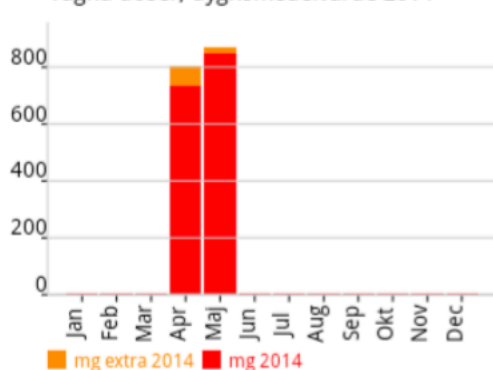

## Följsamhet

10 Missade doser % per dostillfälle

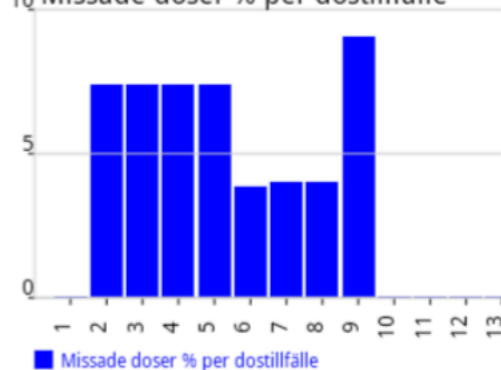

## Behandlingsordination Flexilev

Morgondos: 110 mg (+20 mg, -20 mg)  
 Dagsdos: 8 st  
 Extrados: 50 mg (+20 mg, -20 mg)  
 Dygnsdos: 910 mg

## Behandlingsutfall:

senaste 2 mån (33 dagar)

|            |                   |       |
|------------|-------------------|-------|
| Morgondos: | Medel (mg)        | 115.0 |
| Dagsdos:   | Medel antal doser | 5.8   |
|            | Medeldos (mg)     | 97.0  |
| Extrados:  | Medel antal doser | 0.0   |
|            | Medel (mg)        | 44.0  |
| Dygnsdos:  | Medel (mg)        | 708.0 |

## Missade doser:

|                     |     |
|---------------------|-----|
| Totalt för perioden | 13  |
| Medel per månad     | 6.5 |

## Symptom och rörlighet

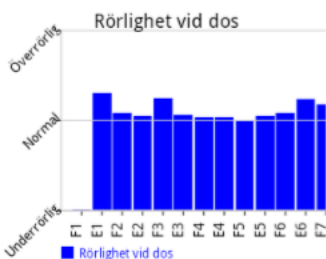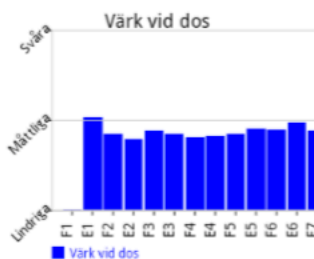

## Statistik

Antal ordinerade symptommatningar: 217

Antal inmatade symptom: 455

Antal extra inmatade symptom: 8

Utskriftsdatum:  
2014-05-12 14:46

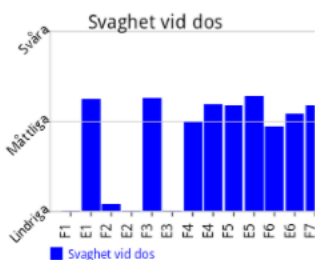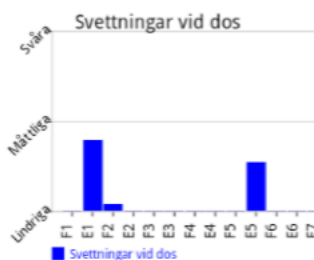

Supplement: IUPS_A_1285374_SM2311.pdf [file IUPS_A_1285374_SM2311.pdf]
